# Supplementary material for: Spinel CoFe2O4: a room temperature magnetic semiconductor with optical transparency
Source: Royal Society of Chemistry journal article supplement (doi:10.1039/d4tc01607f), 2024-01-01
Supplement: d4tc01607f1.pdf [file d4tc01607f1.pdf]

# 1 Spinel $\text{CoFe}_2\text{O}_4$ : Room temperature magnetic semiconductor with optical 2 transparency

3 Imran Khan and Jisang Hong\*

4 Department of Physics, Pukyong National University, Busan 48513, Korea

5  
6  
7 AUTHOR INFORMATION

8 Corresponding Author

9 \*E-mail: [hongj@pknu.ac.kr](mailto:hongj@pknu.ac.kr)

## 10 Supporting information

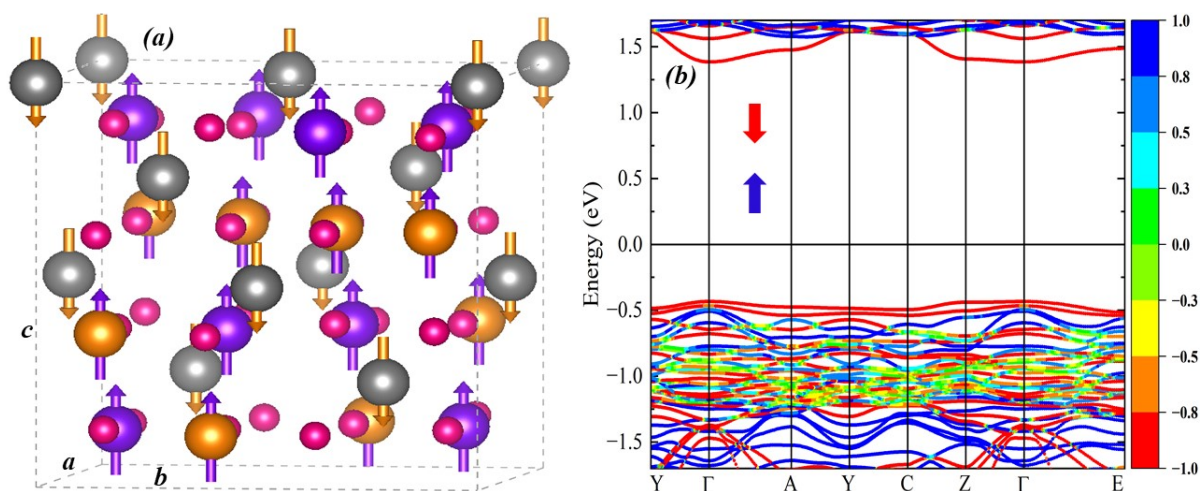

14  
15 **Figure S1.** (a) Ferrimagnetic configurations and (b) spin-projected band structure including SOC in bulk CFO.

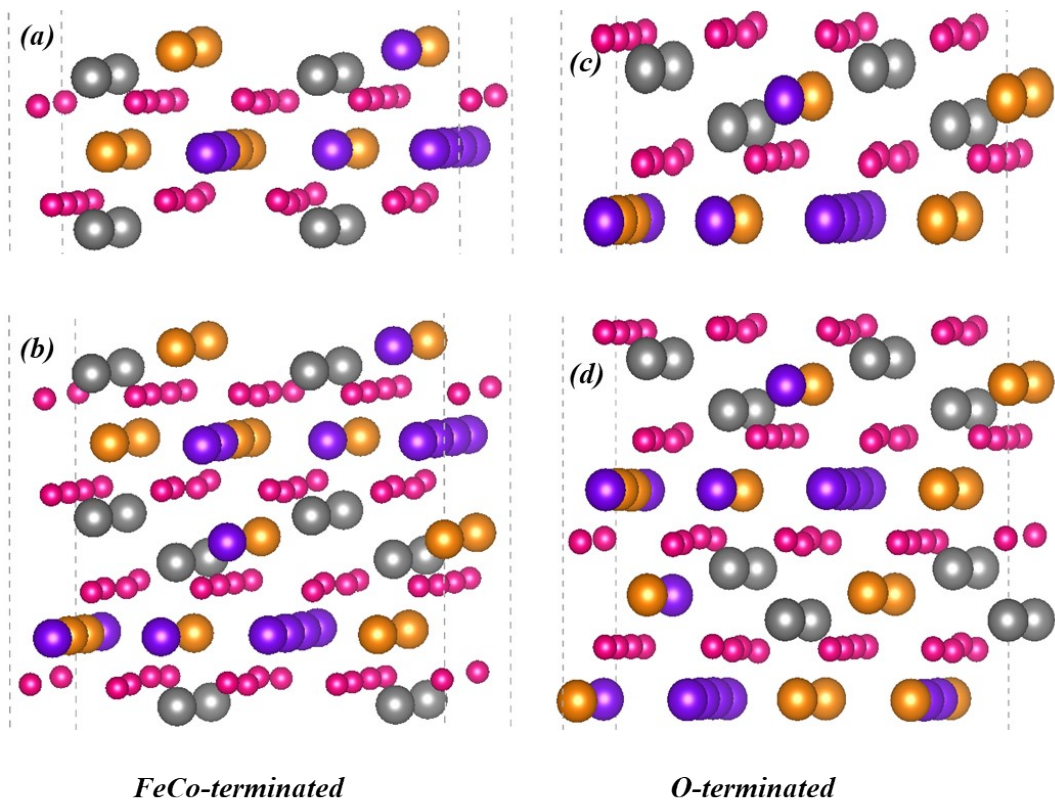

16

17 **Figure S2.** Crystal structures of (a) FeCo-terminated 1UC, (b) FeCo-terminated 2UC, (c) O-terminated 1UC, and O-  
 18 terminated 2UC CFO systems.

19

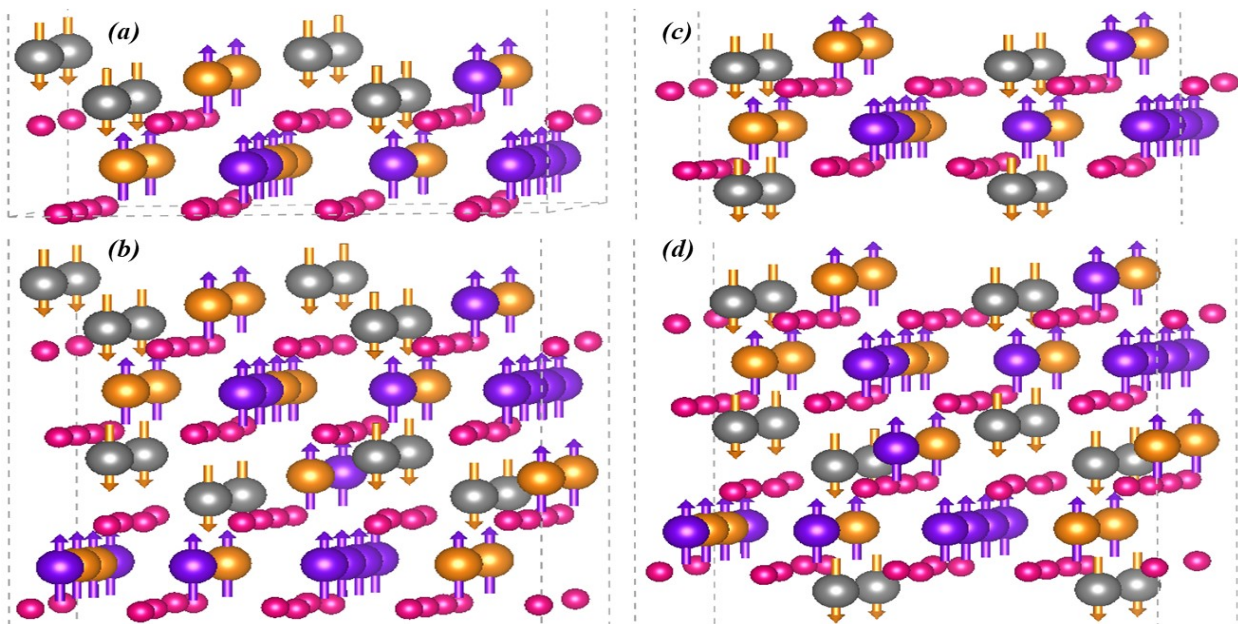

20

21 **Figure S3.** Ferrimagnetic configurations in Fe-terminated (a) 1UC, (b) 2UC, FeCo-terminated (c) 1UC, and (d) 2UC  
 22 thin films.

23

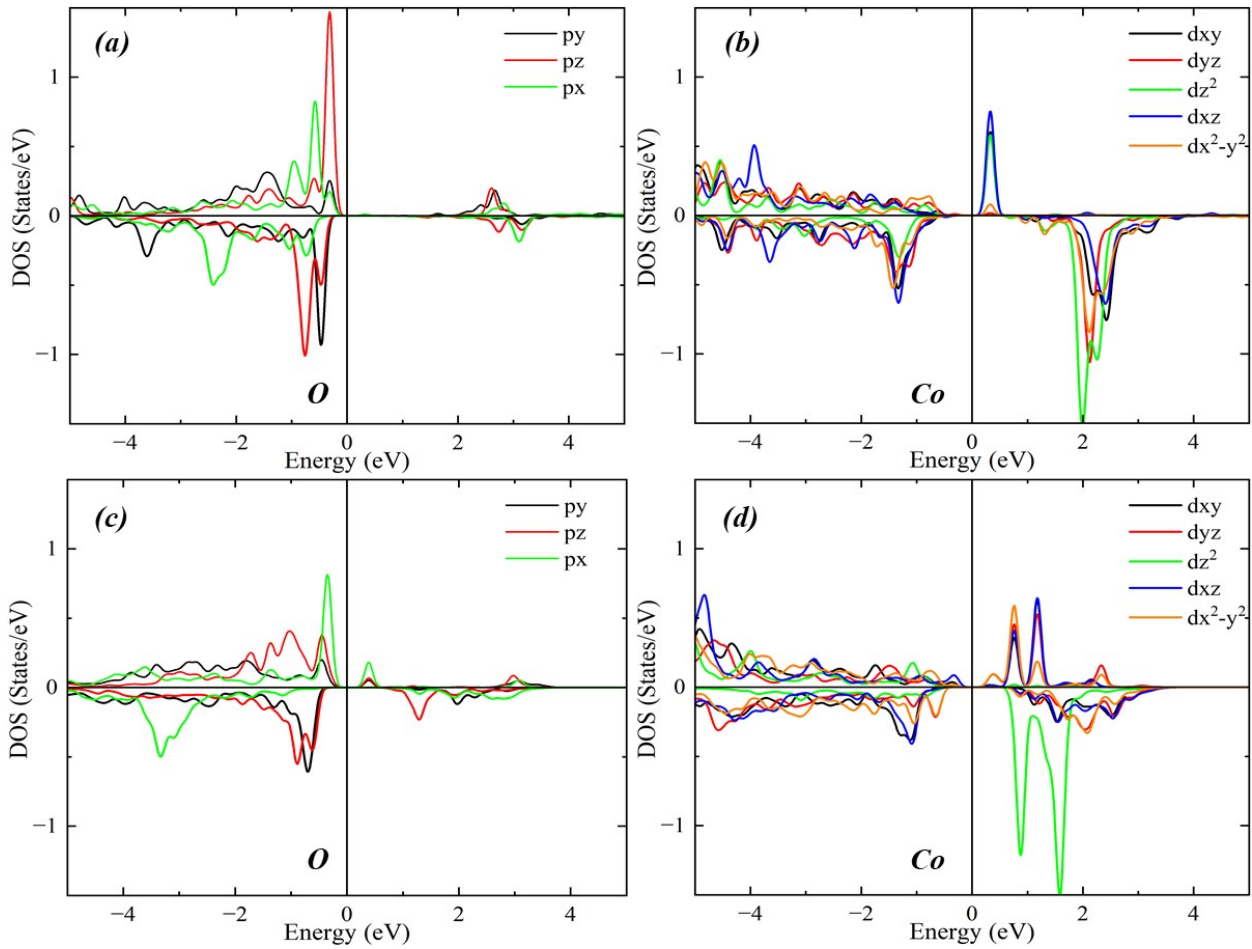

24

25 **Figure S4.** Spin-polarized (a) partial density of states of O in 1UC, (b) partial density of states of Co in 1UC, (c) partial  
 26 density of states of O in 2UC, (d) partial density of states of Co in 2UC with Fe-terminations.

27

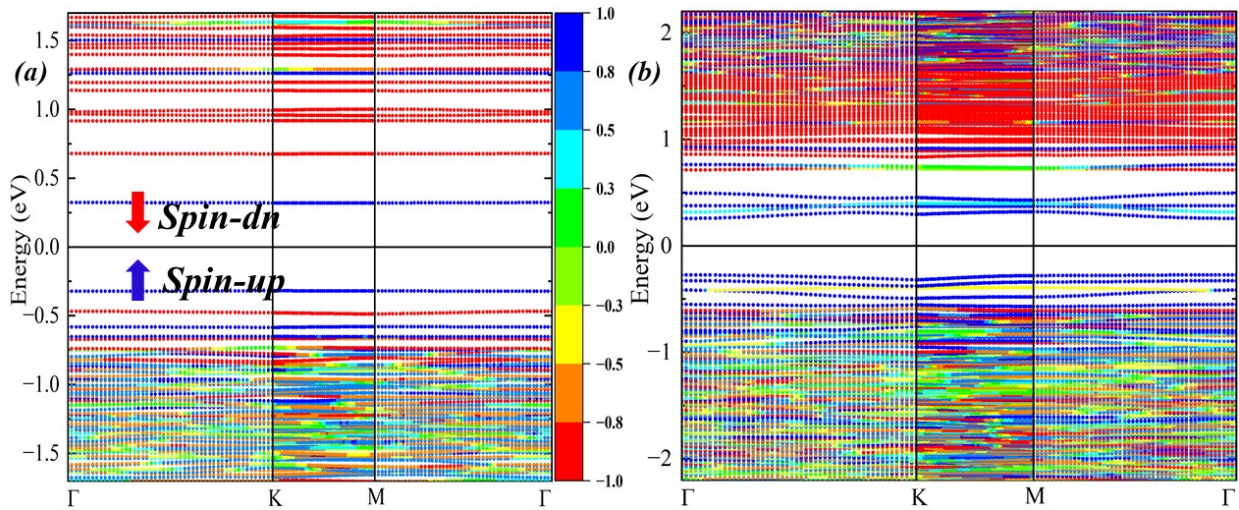

28



29 **Figure S5.** Spin projected band structure after including the SOC (a) 1UC, and (b) 2UC CFO structures with Fe-  
 30 terminations.

31

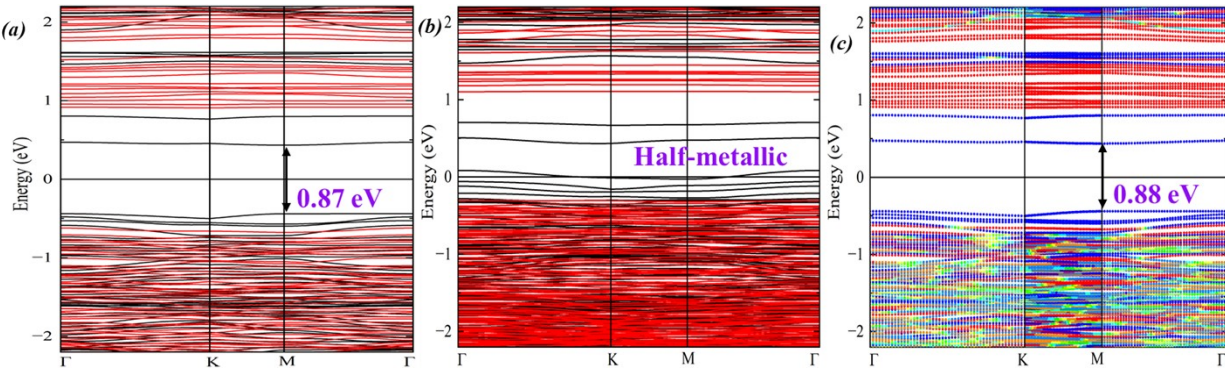

32

33 **Figure S6.** Band structure of (a) 1UC, (b) 2UC without SOC, and (c) 1UC with SOC in FeCo-termination.

34

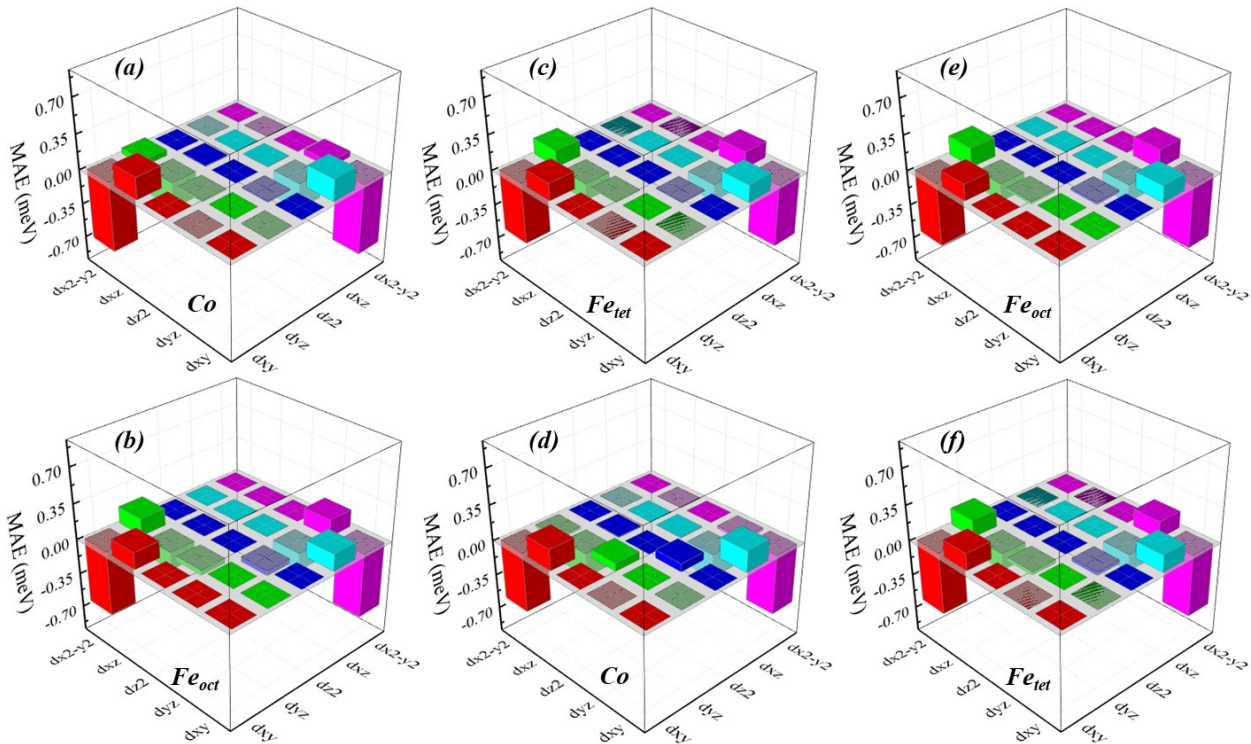

35

36 **Figure S7.** SOC matrix analysis of (a) – (c) Co, Fe<sub>oct</sub>, and Fe<sub>tet</sub> in 1UC thin film, and (d) – (f) Co, Fe<sub>oct</sub>, and Fe<sub>tet</sub> in 2UC  
 37 thin film with FeCo-termination.

38 Figure S7 (a) – (f) in the SI illustrates the SOC matrix elements of the Co, Fe<sub>oct</sub>, and Fe<sub>tet</sub> atoms in 1UC and 2UC CFO  
 39 with FeCo-termination. Here the positive and negative values correspond to contributions to the out-of-plane and  
 40 in-plane MAE. In all the atoms of both thin film systems, the dominant contribution to the in-plane MAE comes from  
 41 the SOC in the ( $d_{x^2-y^2} - d_{xy}$ ) orbitals. The SOC between ( $d_{xz}-d_{xy}$ ) on the other hand produces a small out-of-plane  
 42 contribution also. Nonetheless, the in-plane contribution dominated and we found in-plane anisotropy of -169  
 43  $\mu\text{eV}/\text{atom}$  and -84  $\mu\text{eV}/\text{atom}$  in both systems respectively.

44 **Table S1** Exchange interaction ( $J$ ), single-ion magnetic anisotropy ( $k_2$ ), magnetic moment ( $m_2$ ), and Curie temperature  
 45 ( $T_C$ ) in bulk and thin film CFO structures.

| Systems/parameters  | $J$ ( $\times 10^{-21}$ J) | $k_2$ ( $\times 10^{-24}$ J) | $m_2$ ( $\mu_B$ ) | $T_C$ (K) |
|---------------------|----------------------------|------------------------------|-------------------|-----------|
| Bulk CFO            | 3.63                       | -5.54                        | 2.67              | 843       |
| Fe-terminated 1UC   | 2.71                       | -9.55                        | 2.82              | 471       |
| Fe-terminated 2UC   | 3.43                       | -14.6                        | 2.48              | 582       |
| FeCo-terminated 1UC | 2.18                       | -27.04                       | 2.77              | 375       |
| FeCo-terminated 2UC | 3.48                       | -13.5                        | 2.69              | 591       |

46

47

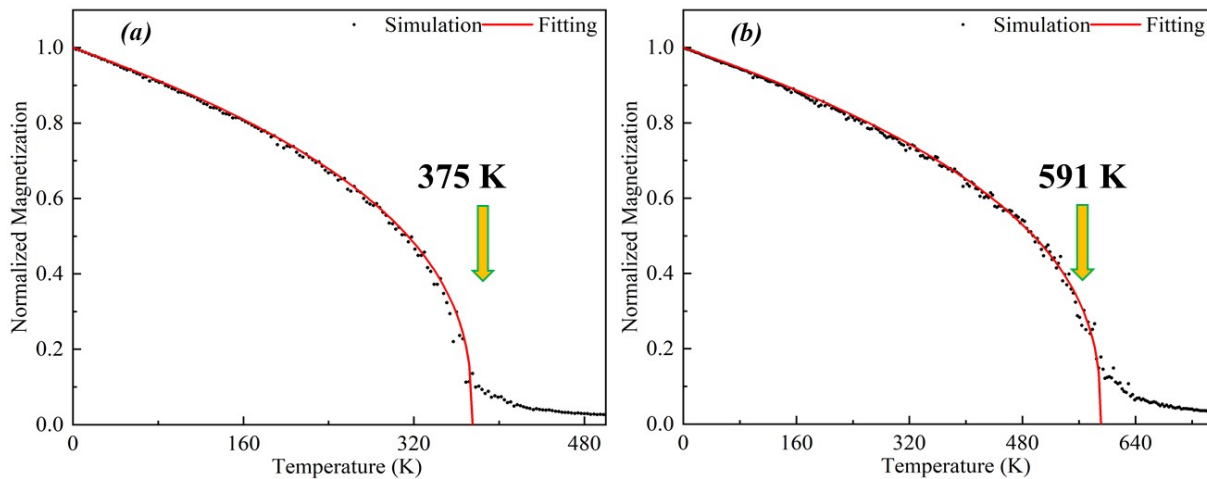

48

49 **Figure S8.** Temperature-dependent magnetization curve for (a) 1UC, and (c) 2UC systems with FeCo-termination.

50

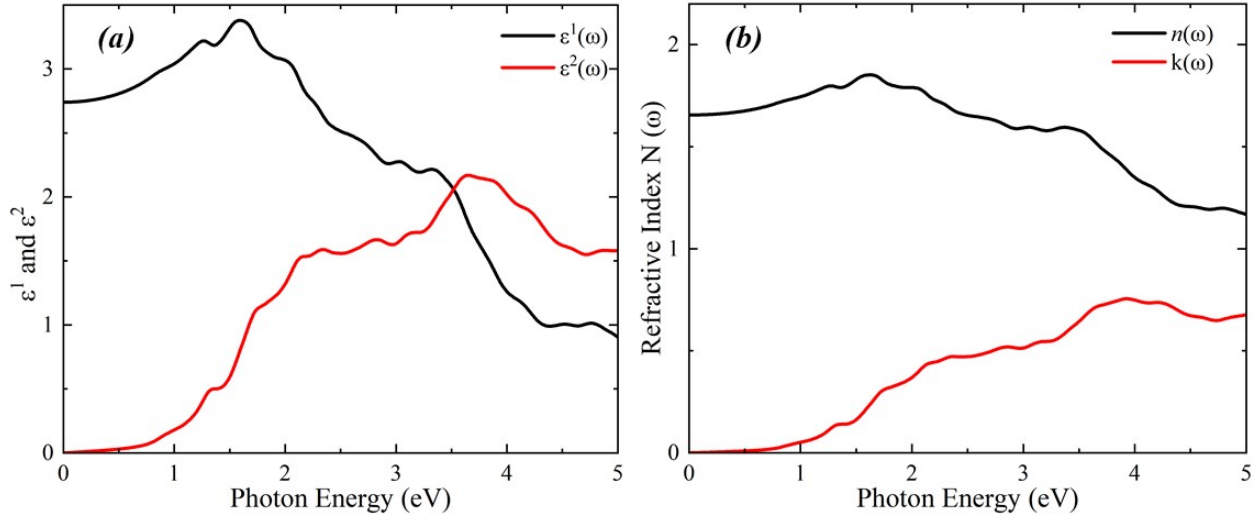

51

52 **Figure S9.** (a) The real and imaginary part of the dielectric function and (b) refractive index of 1UC CFO thin film with  
53 FeCo-termination.

54

55 Figure S9 (a) shows the real and imaginary part of the frequency-dependent dielectric function for 1UC CFO thin film  
56 with FeCo-termination, where the onset of the imaginary part shows the semiconducting nature. Besides, 1UC CFO  
57 thin film has a maximum refractive index of 1.78 as shown in Fig. S9 (b).

58

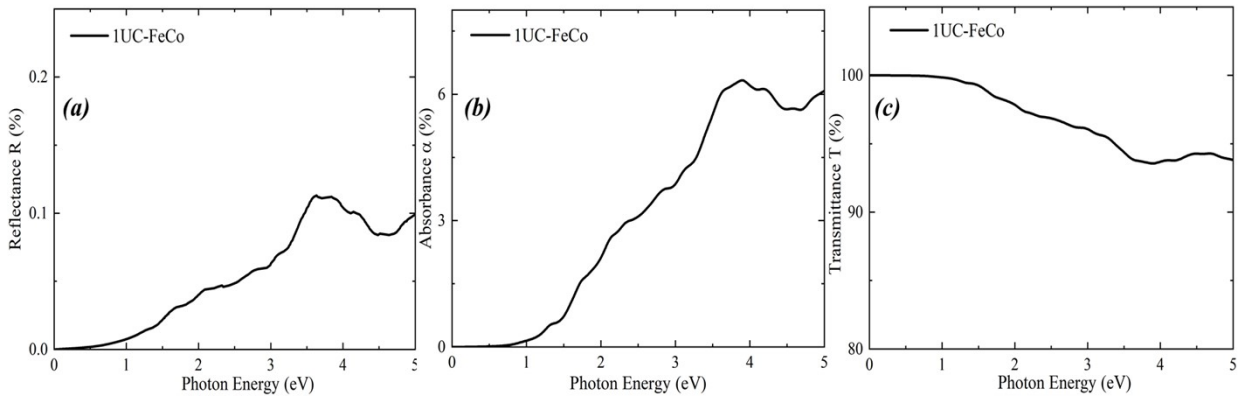

59

60 **Figure S10.** (a) Reflectance (b) absorbance, and (c) transmittance for pristine 1UC thin films with FeCo-termination.

61 Figure S10 (a) shows that the 1UC structure has a very weak reflectance ( $\sim 0.06\%$ ) in visible range. Similarly, the  
62 absorbance is also not that high ( $\sim 3.7\%$ ) as shown in Fig. S10 (b). Consequently, the 1UC with FeCo-termination is  
63 also optically transparent because the transmittance is more than 96% in the visible frequencies.
